# Supplementary material for: Construction of 3D V2O5/hydrogenated-WO3 nanotrees on tungsten foil for high-performance pseudocapacitors
Source: Royal Society of Chemistry journal article supplement (doi:10.1039/c4cp01200c), 2014-01-01
Supplement: c4cp01200c1.pdf [file c4cp01200c1.pdf]

## Supporting Information

# Construction of 3D $\text{V}_2\text{O}_5/\text{hydrogenated-WO}_3$ Nanotrees on Tungsten Foil for High-performance Pseudocapacitors

Fengmei Wang,<sup>a</sup> Yuanchang Li,<sup>a</sup> Zhongzhou Cheng,<sup>b</sup> Kai Xu,<sup>a</sup> Xueying Zhan,<sup>a</sup> Zhenxing Wang<sup>a</sup> and Jun He<sup>\*a</sup>

Received (in XXX, XXX) XthXXXXXXXXXX 20XX, Accepted Xth XXXXXXXXXXXX 20XX

DOI: 10.1039/b000000x

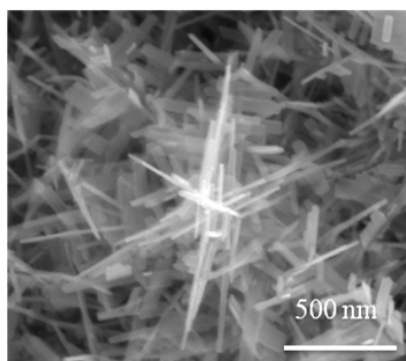

**Fig. S1.** SEM image of the  $\text{WO}_3$  nanotrees on W foil after hydrogenation at 450 °C.

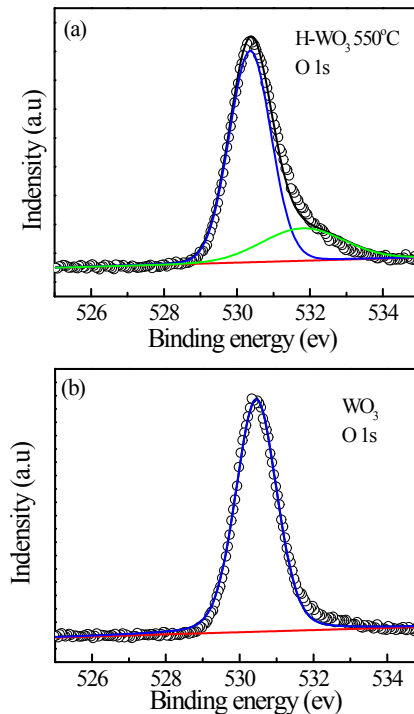

**Fig. S2.** High-resolution O1s XPS spectra of pristine  $\text{WO}_3$  and  $\text{WO}_3$  prepared at 550 °C.

## Areal capacitance calculated from CV curves

The areal capacitances of electrodes measured by cyclic voltammetry (CV) method were calculated based on the following equation: <sup>1,2</sup>

$$C_a = \frac{1}{SV(E_c - E_a)} \int_{E_a}^{E_c} I(E) dE \quad (S1)$$

Where  $C_a$  (mF cm<sup>-2</sup>) is the areal capacitance, V is the potential scan rate (mV s<sup>-1</sup>),  $E_a$  is the anodic potential (V),  $E_c$  is the cathodic potential (V),  $I(E)$  is the response current (A), E is the potential (V) and S (cm<sup>2</sup>) is the effective area of the working electrode.

## Areal and specific capacitance of V<sub>2</sub>O<sub>5</sub>/H-WO<sub>3</sub> composites calculated from discharge curves

The areal and specific capacitances of electrodes measured by galvanostatic charge/discharge (GCD) method were calculated based on the following equation: <sup>3</sup>

$$C_a = \frac{I \Delta t}{S \Delta E} \quad (S2)$$

$$C_s = \frac{I \Delta t}{1000 * m \Delta E} \quad (S3)$$

Where  $C_a$  (mF cm<sup>-2</sup>) and  $C_s$  (F/g) are the areal capacitance and specific capacitance, I (mA) is the constant discharging current,  $\Delta t$  (s) is the discharging time,  $\Delta E$  (V) is the potential window, S (cm<sup>2</sup>) and m (g) are the surface area and the mass of V<sub>2</sub>O<sub>5</sub>.

## The calculation of the device

The volumetric capacitances of the device measured by galvanostatic charge/discharge (GCD) method were calculated based on the following equation

$$C_v = \frac{I \Delta t}{V \Delta E} \quad (S4)$$

Where  $C_v$  (mF cm<sup>-3</sup>) volumetric capacitance, I (mA) is the constant discharging current,  $\Delta t$  (s) is the discharging time,  $\Delta E$  (V) is the potential window, V (cm<sup>3</sup>) is the volume of all solid-stated device.

The energy and power density of the device were calculated from the following equation: <sup>4-6</sup>

$$E = \frac{C_v \Delta E^2}{2} \quad (S5)$$

$$P = \frac{E}{t} \quad (S6)$$

Where  $C_v$  is the volumetric capacitance of the device,  $\Delta E$  is the cell voltage, t is the discharge time.

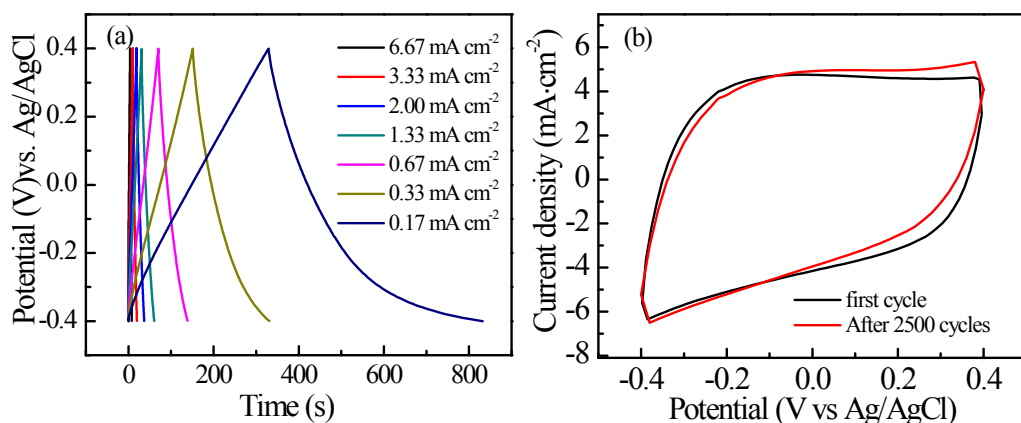

**Fig. S3.** (a) Galvanostatic charge/discharge curves of H-WO<sub>3</sub> (450 °C) electrode at various current density. The effective area of electrode is 1.5 cm<sup>2</sup>. (b) CV curves of the H-WO<sub>3</sub> electrode at the 1<sup>st</sup> and 2500<sup>th</sup> cycles at a scan rate of 100 mV s<sup>-1</sup>.

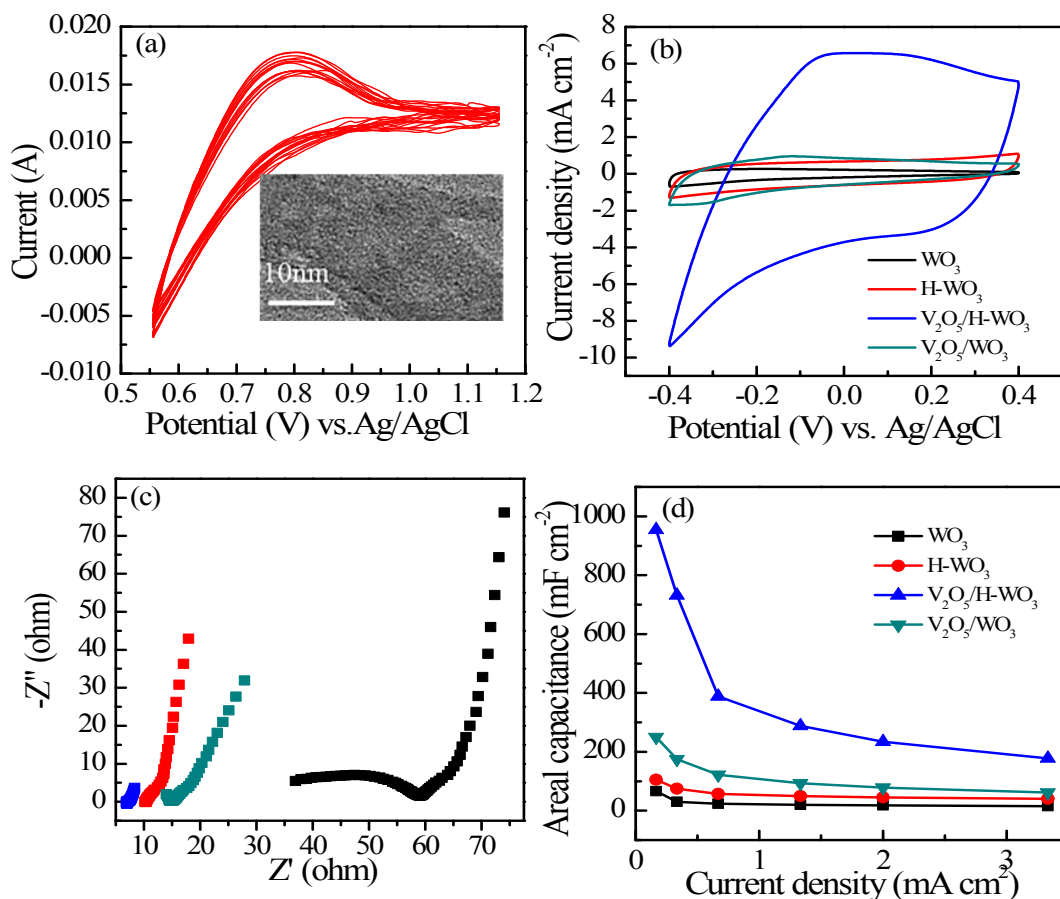

**Fig. S4.** (a) Cyclic voltammograms of the sample with 15 cycles of V<sub>2</sub>O<sub>5</sub> electrodeposition (the inset is HRTEM of V<sub>2</sub>O<sub>5</sub> film). (b) CV curves collected at a scan rate of 10 mV s<sup>-1</sup> for WO<sub>3</sub>, H-WO<sub>3</sub>, V<sub>2</sub>O<sub>5</sub>/WO<sub>3</sub> and V<sub>2</sub>O<sub>5</sub>/H-WO<sub>3</sub> samples. (c) EIS spectra of WO<sub>3</sub>, H-WO<sub>3</sub>, V<sub>2</sub>O<sub>5</sub>/WO<sub>3</sub> and V<sub>2</sub>O<sub>5</sub>/H-WO<sub>3</sub> electrodes. (d) Areal capacitances calculated for WO<sub>3</sub>, H-WO<sub>3</sub>, V<sub>2</sub>O<sub>5</sub>/WO<sub>3</sub> and V<sub>2</sub>O<sub>5</sub>/H-WO<sub>3</sub> electrodes as a function of current densities.

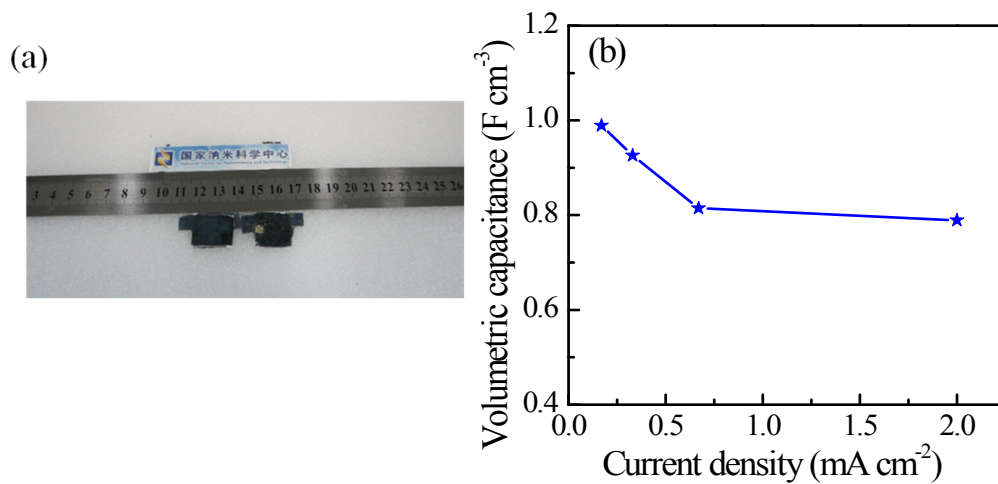

**Fig. S5.** (a) The photo of the solid-state devices with the effective areal of 1.5 cm<sup>2</sup>. (b) Volumetric capacitances calculated from the galvanostatic charge-discharge curves as a function of current densities.

**Table S1.** Comparison of the specific capacitance, energy density and power density of our single electrode with the literature values (only based on mass of V<sub>2</sub>O<sub>5</sub>). “-” means that the data was not given in the reference. ( $E = \frac{C_s \Delta E^2}{2}$ ,  $P = \frac{E}{t}$ , C<sub>s</sub> is the specific capacitance of the single electrode, which is measured in three-electrode system)

| Electrode                                           | Specific capacitance<br>(C <sub>s</sub> / F g <sup>-1</sup> ) | Energy density<br>(E,/ Wh kg <sup>-1</sup> ) | Power density<br>(P/ W kg <sup>-1</sup> ) | Reference |
|-----------------------------------------------------|---------------------------------------------------------------|----------------------------------------------|-------------------------------------------|-----------|
| V <sub>2</sub> O <sub>5</sub> · 0.6H <sub>2</sub> O | 180.7                                                         | 20.3                                         | 2000                                      | 7         |
| V <sub>2</sub> O <sub>5</sub> film                  | 1308                                                          | 45                                           | 156                                       | 8         |
| V <sub>2</sub> O <sub>5</sub> nanosheets            | 451                                                           | 107                                          | 9400                                      | 9         |
| V <sub>2</sub> O <sub>5</sub> /rGO                  | 320                                                           | -                                            | -                                         | 10        |
| V <sub>2</sub> O <sub>5</sub> nanotube              | -                                                             | 11.6                                         | 1200                                      | 11        |
| V <sub>2</sub> O <sub>5</sub> /H-WO <sub>3</sub>    | 1101                                                          | 98                                           | 1538                                      | Our study |

1. H. B. Li, M. H. Yu, F. X. Wang, P. Liu, Y. Liang, J. Xiao, C. X. Wang, Y. X. Tong and G. W. Yang, *Nat Commun*, 2013, **4**, 1894.
2. X. Fan, Y. Lu, H. Xu, X. Kong and J. Wang, *J. Mater. Chem.*, 2011, **21**, 18753.
3. X. H. Lu, *Nano Lett.*, 2012, **12**, 1690-1696.
4. X. Xiao, *Adv. Energy Mater.*, 2012, **2**, 1328-1332.
5. P. Yang, X. Xiao, Y. Li, Y. Ding, P. Qiang, X. Tan, W. Mai, Z. Lin, W. Wu, T. Li, H. Jin, P. Liu, J. Zhou, C. P. Wong and Z. L. Wang, *ACS Nano*, 2013, **7**, 2617-2626.
6. Z. Fan, J. Yan, T. Wei, L. Zhi, G. Ning, T. Li and F. Wei, *Advanced Functional Materials*, 2011, **21**, 2366-2375.
7. Q. T. Qu, Y. Shi, L. L. Li, W. L. Guo, Y. P. Wu, H. P. Zhang, S. Y. Guan and R. Holze, *Electrochemistry Communications*, 2009, **11**, 1325-1328.
8. A. Ghosh, E. J. Ra, M. Jin, H.-K. Jeong, T. H. Kim, C. Biswas and Y. H. Lee, *Advanced Functional Materials*, 2011, **21**, 2541-2547.
9. J. Zhu, L. Cao, Y. Wu, Y. Gong, Z. Liu, H. E. Hoster, Y. Zhang, S. Zhang, S. Yang, Q. Yan, P. M. Ajayan and R. Vajtai, *Nano letters*, 2013, **13**, 5408-5413.
10. H. Zhang, A. Xie, C. Wang, H. Wang, Y. Shen and X. Tian, *Chemphysche.*, 2014, **15**, 366-373..
11. S. D. Perera, B. Patel, J. Bonso, M. Grunewald, J. P. Ferraris and K. J. Balkus, Jr., *ACS applied materials & interfaces*, 2011, **3**, 4512-4517.
